# Supplementary material
Source: PubMed Central journal article supplement (PMC5842146)
Supplement: NIHMS934812-supplement-Sup1.pdf [file NIHMS934812-supplement-Sup1.pdf]

## 1. Supplementary Material on Section 2

*Proof of the asymptotic normal distribution of  $\hat{B}$*

By Central Limit Theorem, we have

$$\sqrt{n_{ij}}(\hat{\eta}_{ij} - \eta_{ij}) \xrightarrow{d} N(0, \eta_{ij}(1 - \eta_{ij})), i = E, C, j = 0, 1$$

Since  $\hat{\eta}_{ij}$ s are independent of each other, let  $\eta = (\eta_{E1}, \eta_{C1}, \eta_{E0}, \eta_{C0})^T$ , then we have

$$\sqrt{n}(\hat{\eta} - \eta) \xrightarrow{d} N(0, \Omega)$$

where  $\Omega = \text{Diag}(\frac{n}{n_{ij}}\eta_{ij}(1 - \eta_{ij}))$

Note that  $\hat{\pi} \xrightarrow{P} \pi$ , let  $\pi^* = (\pi, -\pi, 1 - \pi, \pi - 1)^T$ , then we have  $\hat{\pi}^* \xrightarrow{P} \pi^*$ . Thus, by Slutsky's Theorem, we have

$$\begin{aligned} \sqrt{n}(\hat{B} - B) &= \sqrt{n}(\hat{\pi}^{*T}\hat{\eta} - \pi^{*T}\eta) \\ &= \sqrt{n}(\hat{\pi}^{*T}(\hat{\eta} - \eta)) + \sqrt{n}(\hat{\pi}^{*T} - \pi^{*T})\eta \\ &\xrightarrow{d} N(0, \pi^{*T}\Omega\pi^*) + \sqrt{n}(\hat{\pi}^{*T} - \pi^{*T})\eta \\ &= N(0, \pi^2\left(\frac{n\eta_{E1}(1 - \eta_{E1})}{n_{E1}} + \frac{n\eta_{C1}(1 - \eta_{C1})}{n_{C1}}\right) + (1 - \pi)^2\left(\frac{n\eta_{E0}(1 - \eta_{E0})}{n_{E0}} + \frac{n\eta_{C0}(1 - \eta_{C0})}{n_{C0}}\right)) \end{aligned}$$

Thus

$$\begin{aligned} \text{var}(\hat{B}) &= \pi^2\frac{\eta_{E1}(1 - \eta_{E1})}{n_{E1}} + \pi^2\frac{\eta_{C1}(1 - \eta_{C1})}{n_{C1}} + (1 - \pi)^2\frac{\eta_{E0}(1 - \eta_{E0})}{n_{E0}} + (1 - \pi)^2\frac{\eta_{C0}(1 - \eta_{C0})}{n_{C0}} \\ &= \pi^2\text{var}(\hat{\eta}_{E1}) + \pi^2\text{var}(\hat{\eta}_{C1}) + (1 - \pi)^2\text{var}(\hat{\eta}_{E0}) + (1 - \pi)^2\text{var}(\hat{\eta}_{C0}). \end{aligned}$$

And we have

$$\frac{\hat{B} - B}{\sqrt{\text{var}(\hat{B})}} \sim N(0, 1)$$

When  $n$  is large, we can estimate  $\text{var}(\hat{B})$  by  $\widehat{\text{var}}(\hat{B})$  as shown in Section 2.1.

## Supplementary Material on Section 4

*Testing two hypotheses: Details of determining local optimal  $\pi_e$ ,  $\pi_e^{localopt}$*

The solution for  $n(\tilde{\pi}_e; H_{1a}) = n(\tilde{\pi}_e; H_{2a})$  is given as

$$\pi_e^{interact} = \frac{(\delta^2 - B_1^2)[\eta_{E1}(1 - \eta_{E1}) + \eta_{C1}(1 - \eta_{C1})]}{(\delta^2 - B_1^2)[\eta_{E1}(1 - \eta_{E1}) + \eta_{C1}(1 - \eta_{C1})] + B_1^2[\eta_{E0}(1 - \eta_{E0}) + \eta_{C0}(1 - \eta_{C0})]}$$

When  $\pi_e^{interact} \in [\pi_e^{opt}, 1]$ ,

If  $\pi_e^{interact} \in [\min(\pi, PPV), \max(\pi, PPV)]$ , then  $\pi_e^{localopt} = \pi_e^{interact}$  and  $n_{max}^{opt} = n(\pi_e^{interact}; H_{1a}) = n(\pi_e^{interact}; H_{2a})$ .

Else,  $\pi_e^{localopt} = \pi$  or  $PPV$ , which is closer to  $\pi_e^{interact}$ , and  $n_{max}^{opt} = \max(n(\pi_e^{localopt}; H_{1a}), n(\pi_e^{localopt}; H_{2a}))$ .

When  $\pi_e^{interact} \in [0, \pi_e^{opt}]$ ,

If  $\pi_e^{opt} \in [\min(\pi, PPV), \max(\pi, PPV)]$ , then  $\pi_e^{localopt} = \pi_e^{opt}$  and  $n_{max}^{opt} = n(\pi_e^{opt}; H_{2a})$ .

Else,  $\pi_e^{localopt} = \pi$  or  $PPV$ , which is closer to  $\pi_e^{opt}$ , and  $n_{max}^{opt} = \max(n(\pi_e^{localopt}; H_{1a}), n(\pi_e^{localopt}; H_{2a}))$ .

When  $\hat{\pi}_e^{*opt} \notin [0, 1]$ ,

If  $\frac{\text{var}(\hat{B}_1; \pi_e = \max(\pi, PPV))}{\hat{B}_1^2} > \frac{\text{var}(\hat{\delta}; \pi_e = \max(\pi, PPV))}{\hat{\delta}^2}$ , then  $\pi_e^{localopt} = \max(\pi, PPV)$  and  $n_{max}^{opt} = n(\pi_e^{localopt}; H_{1a})$ .

Else, if  $\pi_e^{opt} \in [\min(\pi, PPV), \max(\pi, PPV)]$ , then  $\pi_e^{localopt} = \pi_e^{opt}$  and  $n_{max}^{opt} = n(\pi_e^{localopt}; H_{1a})$ , and if  $\pi_e^{opt} \notin [\min(\pi, PPV), \max(\pi, PPV)]$ ,  $\pi_e^{localopt} = \pi$  or  $PPV$ , which is closer to  $\pi_e^{opt}$ , and  $n_{max}^{opt} = n(\pi_e^{localopt}; H_{1a})$ .

## Supplementary Material on Section 5

[Figure S1 about here.]

[Table S1 about here.]

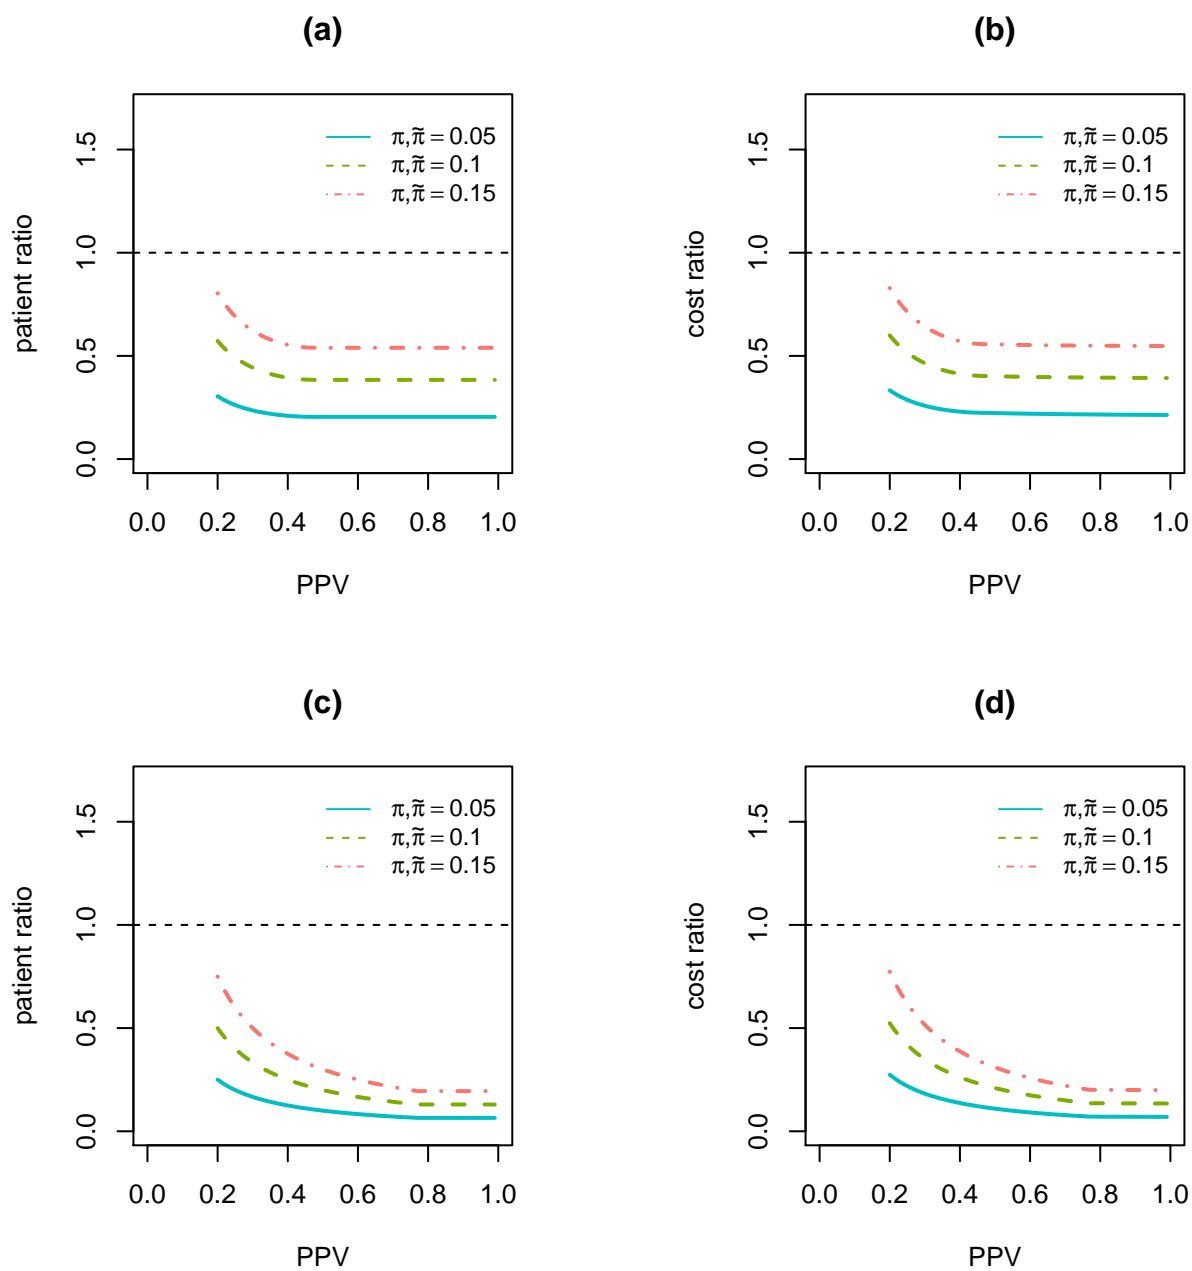

**Figure S1:** Relationship of patient ratio and cost ratio with  $PPV$  for testing  $B_1$  and  $\delta$  under AEBS. (a) Patient ratio with quantitative interaction; (b) Cost ratio with quantitative interaction; (c) Patient ratio with qualitative interaction; (d) Cost ratio with qualitative interaction.

Table S1: Numerical results for AEBSD design for testing both  $B_1$  and  $\delta$ 

| $\pi$                    | $\tilde{\pi}$ | $PPV$ | $\tilde{\pi}_e^{opt}$ | $n_{aebsd}$ | $ns_{aebsd}$ | $n_{bsd}$ | $n_{ratio}$ | $c_{ratio}$ | $ns_{ratio}$ |
|--------------------------|---------------|-------|-----------------------|-------------|--------------|-----------|-------------|-------------|--------------|
| quantitative interaction |               |       |                       |             |              |           |             |             |              |
| 0.05                     | 0.05          | 0.2   | 1.000                 | 5108        | 102160       | 16772     | 0.305       | 0.334       | 6.091        |
|                          |               | 0.5   | 0.958                 | 3428        | 65669        | 16772     | 0.204       | 0.223       | 3.915        |
|                          |               | 0.8   | 0.595                 | 3428        | 40773        | 16772     | 0.204       | 0.216       | 2.431        |
| 0.1                      | 0.1           | 0.2   | 1.000                 | 5108        | 51081        | 8928      | 0.572       | 0.599       | 5.721        |
|                          |               | 0.5   | 0.955                 | 3428        | 32739        | 8928      | 0.384       | 0.401       | 3.667        |
|                          |               | 0.8   | 0.589                 | 3428        | 20178        | 8928      | 0.384       | 0.395       | 2.260        |
| 0.15                     | 0.15          | 0.2   | 1.000                 | 5108        | 34054        | 6356      | 0.804       | 0.829       | 5.358        |
|                          |               | 0.5   | 0.951                 | 3428        | 21745        | 6356      | 0.539       | 0.556       | 3.421        |
|                          |               | 0.8   | 0.582                 | 3428        | 13291        | 6356      | 0.539       | 0.549       | 2.091        |
| qualitative interaction  |               |       |                       |             |              |           |             |             |              |
| 0.05                     | 0.05          | 0.2   | 1.000                 | 2037        | 40740        | 8147      | 0.250       | 0.274       | 5.000        |
|                          |               | 0.5   | 1.000                 | 815         | 16300        | 8147      | 0.100       | 0.110       | 2.000        |
|                          |               | 0.8   | 0.962                 | 529         | 10182        | 8147      | 0.065       | 0.071       | 1.250        |
| 0.1                      | 0.1           | 0.2   | 1.000                 | 2037        | 20371        | 4074      | 0.500       | 0.524       | 5.000        |
|                          |               | 0.5   | 1.000                 | 815         | 8150         | 4074      | 0.200       | 0.210       | 2.000        |
|                          |               | 0.8   | 0.962                 | 529         | 5088         | 4074      | 0.130       | 0.136       | 1.249        |
| 0.15                     | 0.15          | 0.2   | 1.000                 | 2037        | 13580        | 2716      | 0.750       | 0.774       | 5.000        |
|                          |               | 0.5   | 1.000                 | 815         | 5434         | 2716      | 0.300       | 0.310       | 2.000        |
|                          |               | 0.8   | 0.962                 | 529         | 3390         | 2716      | 0.195       | 0.201       | 1.248        |

$\tilde{\pi}_e^{opt}$  is optimal enrichment proportion for auxiliary positive patient;  $n_{aebsd}$  is the number of randomized patients for AEBSD;  $n_{bsd}$  is the number of randomized patients for BSD;  $n_{bsd}$  is the number of randomized patients for BSD;  $n_{ratio}$  is the ratio of  $n_{EBS D}$  and  $n_{B S D}$ ;  $ns_{ratio}$  is the ratio of the number of screened patients for AEBSD versus BSD;  $c_{ratio}$  is the cost ratio for conducting AEBSD and BSD.  $\alpha_1 = \alpha_2 = 0.025, \beta_1 = \beta_2 = 0.1$ . The unit cost is 500 for ascertaining the true biomarker, the average unit cost is 10,000 for treatment and follow-up and the unit cost is 50 for ascertaining the auxiliary variable.
